# Supplementary material for: Dynamic clicked surfaces based on functionalised pillar[5]arene
Source: Royal Society of Chemistry journal article supplement (doi:10.1039/c1cc14934b), 2011-01-01
Supplement: c1cc14934b.pdf [file c1cc14934b.pdf]

# ChemComm

Chemical Communications

## Dynamic Clicked Surfaces Based on Functionalised Pillar[5]arene

Huacheng Zhang,<sup>a</sup> Nathan L. Strutt,<sup>a,b</sup> Ragnar S. Stoll,<sup>a</sup> Hao Li,<sup>a</sup> Zhixue Zhu,<sup>a</sup> and J. Fraser Stoddart\*<sup>a,b</sup>

<sup>a</sup>*Department of Chemistry, Northwestern University, 2145 Sheridan Road,  
Evanston, IL, 60208-3113, USA.*

<sup>b</sup>*Graduate School of EEWS (WCU), Advanced Institute of Science and Technology (KAIST),  
373-1, Guseong Dong, Yuseong Gu, Daejeon 305-701, Republic of Korea.*

## Electronic Supplementary Information

|                       |       |
|-----------------------|-------|
| General Methods       | S2    |
| Compounds Synthesised | S3    |
| Synthesis of <b>1</b> | S3    |
| Figure S1—S9          | S4—S8 |
| Table S1              | S8    |
| References            | S9    |

\* To Whom Correspondence should be Addressed

**Professor J Fraser Stoddart**  
Department of Chemistry  
Northwestern University  
2145 Sheridan Road  
Evanston, IL 60208-3113, USA  
Tel: (+1)-847-491-3793  
Fax: (+1)-847-491-1009  
E-mail: [stoddart@northwestern.edu](mailto:stoddart@northwestern.edu)

## General Methods

Reagents were purchased from Aldrich and used without further purification. 4-hydroxy-4'-ethynyl azobenzene<sup>S1</sup> (**2**) and azido-pillar[5]arene<sup>S2</sup> (**3**) were synthesised according to the literature procedures. The THF was dried using a commercial solvent purification system (SG Water, Inc.). The H<sub>2</sub>O used was triply distilled. The UV lamp is a Blak-Ray series, model B100A/R and 365 nm longwave UV, purchased from UVP, LLC. UV spectra were recorded with TU-1800pc UV-Vis Spectrophotometer at 298 K. The stock solutions (10<sup>-2</sup> mol·L<sup>-1</sup>) of **1** were prepared with triply distilled H<sub>2</sub>O. All sample solutions for the investigation of the CAC were freshly prepared by diluting the stock solutions according to literature procedures.<sup>S3</sup>

1D and 2D nuclear magnetic resonance (NMR) spectra were recorded at 298 K on Bruker Avance III 500 spectrometer with working frequencies of 500 MHz for <sup>1</sup>H and 125 MHz for <sup>13</sup>C nuclei. Chemical shifts are reported in ppm relative to the signals corresponding to the residual non-deuterated solvent (CDCl<sub>3</sub>: δ 7.26 ppm; Tetrahydrofuran-*d*<sub>8</sub>: δ 1.73 and 3.58 ppm; D<sub>2</sub>O: δ 4.79 ppm), and coupling constants were recorded in Hertz (Hz). All <sup>13</sup>C NMR spectra were recorded with the simultaneous decoupling of <sup>1</sup>H nuclei. The following abbreviations were used to explain the multiplicities: s, singlet; d, doublet; t, triplet; b, broad peaks; m, multiplet or overlapping peaks. Electrospray Ionization (ESI) mass spectra were obtained on an Agilent LC-TOF high-resolution mass spectrometer.

Negative-stained TEM and Cryo-TEM were measured on a Hitachi H-8100 electron microscope (100—200 kV) equipped with slow scan CCD and using cold cathode field emission as the gun. The samples for negative-stained TEM were prepared by dropping a droplet of the orange yellow sample solution onto a TEM grid (copper grid, 300 meshes, coated with carbon film), immediately staining with 2% uranyl acetate in H<sub>2</sub>O (about 2 μL) and allowing to air-dry. SEM images were obtained on a FEI Quanta 600 SFEG scanning electron microscope (0.2—30 kV) equipped with both solid-state BSED and low vacuum LFSED as detectors. Atomic force microscopy was performed by using a multimode Nanoscope IIIA system operated in tapping mode using silicon cantilevers. DLS measurements were carried out with a Zetasizer Nano ZS instrument purchased from Malvern Instruments Ltd. at 298 K using a 633 nm 'red' laser. The mean hydrodynamic radius was calculated with Zetasizer software.

## Compounds Synthesised

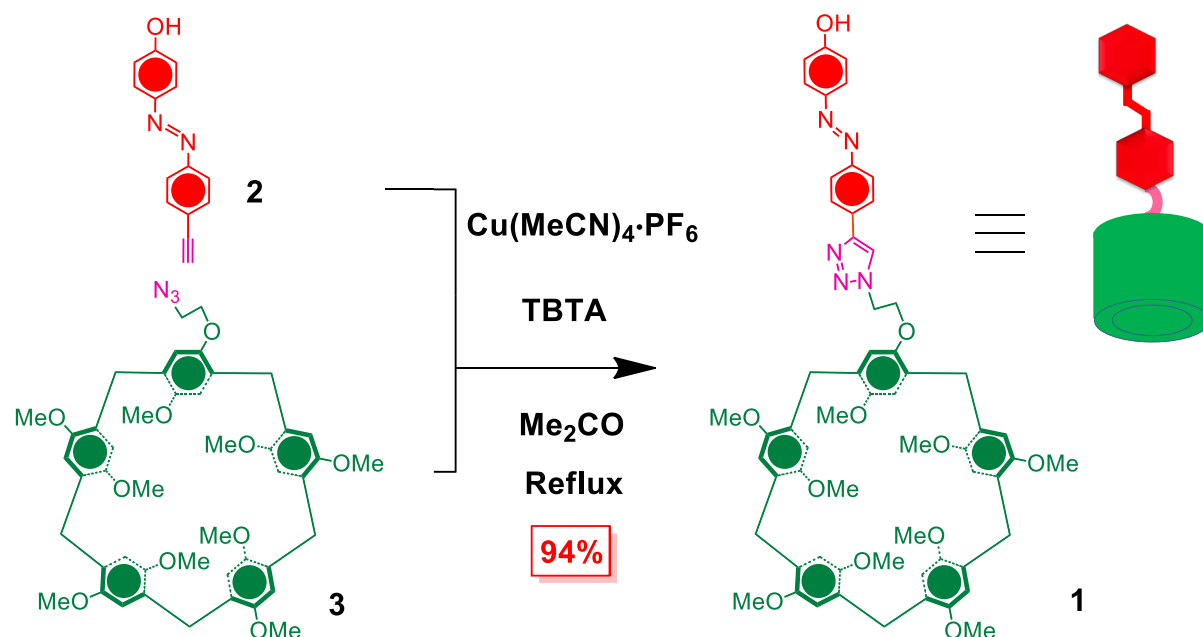

## Synthesis of 1

**1**: 4-hydroxy-4'-ethynyl azobenzene (**2**, 25 mg, 0.11 mmol) and **3** (90 mg, 0.11 mmol), tetrakis(acetonitrile) copper(I) hexafluorophosphate (4.1 mg, 0.011 mmol) and tris[(1-benzyl-1H-1,2,3-triazol-4-yl)methyl] amine (TBTA) were dissolved in  $\text{Me}_2\text{CO}$  (20 mL). The mixture was then stirred under reflux for 2 days. The solution was then poured into  $\text{H}_2\text{O}$  (200 mL). The aqueous phase was extracted ( $3 \times 200$  mL) with  $\text{CH}_2\text{Cl}_2$ . The combined organic layers were dried ( $\text{Mg}_2\text{SO}_4$ ) and the solvent was removed in vacuum. The mixture was subjected to column chromatography ( $\text{SiO}_2$ , gradient elution from 2% up to 20% MeOH in  $\text{CH}_2\text{Cl}_2$ ) to afford **1** (108.3 mg) in 94% yield.  $^1\text{H}$  NMR (500 MHz,  $\text{CDCl}_3$ ):  $\delta$  = 8.16 (s, 1H), 7.97 (t,  $J$  = 10 Hz, 4H), 7.91 (d,  $J$  = 10 Hz, 2H), 7.01 (d,  $J$  = 5 Hz, 2H), 6.86-6.74 (m, 8H), 6.44 (t,  $J$  = 5 Hz, 2H), 4.35 (d,  $J$  = 5 Hz, 2H), 3.83-3.78 (m, 12H), 3.72-3.59 (m, 26H), 3.43 (s, 3H).  $^{13}\text{C}$  NMR (125 MHz,  $\text{CDCl}_3$ ):  $\delta$  = 159.2, 152.3, 151.6, 151.2, 151.0, 150.7, 132.1, 128.9, 128.6, 128.4, 128.1, 127.8, 127.6, 126.2, 125.1, 123.2, 121.6, 115.9, 115.2, 114.6, 114.4, 114.2, 114.1, 113.8, 67.2, 55.9, 50.1, 29.9. HR-MS (ESI):  $\text{C}_{60}\text{H}_{61}\text{N}_5\text{O}_{11}$  calcd for  $m/z$  = 1028.4440, found  $m/z$  = 1028.4443  $[M + \text{H}]^+$ .

Figure S1—S9

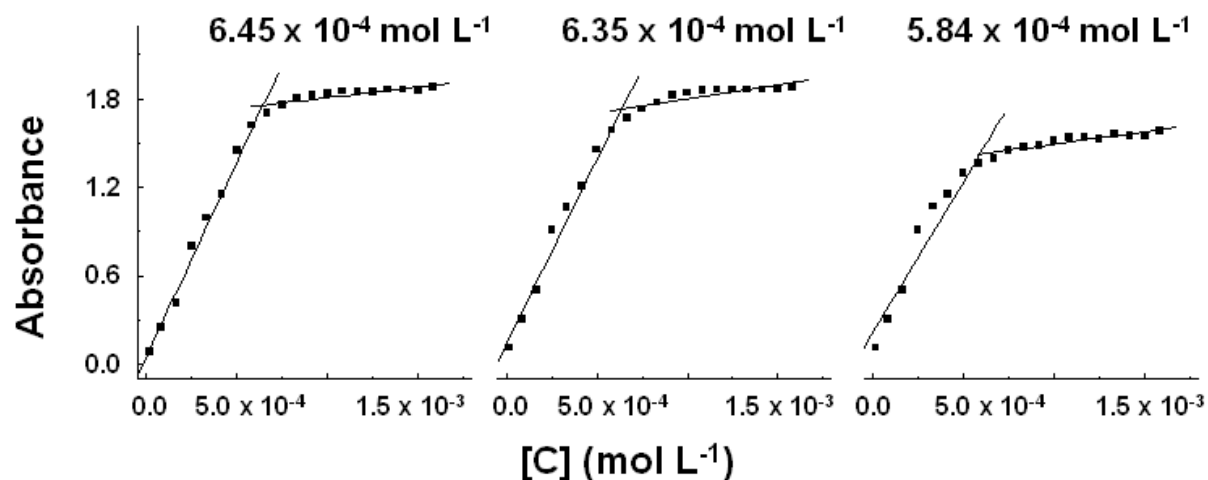

Fig. S1 The critical assembly concentration (CAC) of **1** in the 1/2 (v/v) mixture of H<sub>2</sub>O and THF was determined in three separate trials, giving an average value of  $0.62 \pm 0.03$  mM by detection of the maximum absorption band in the UV-vis spectra.

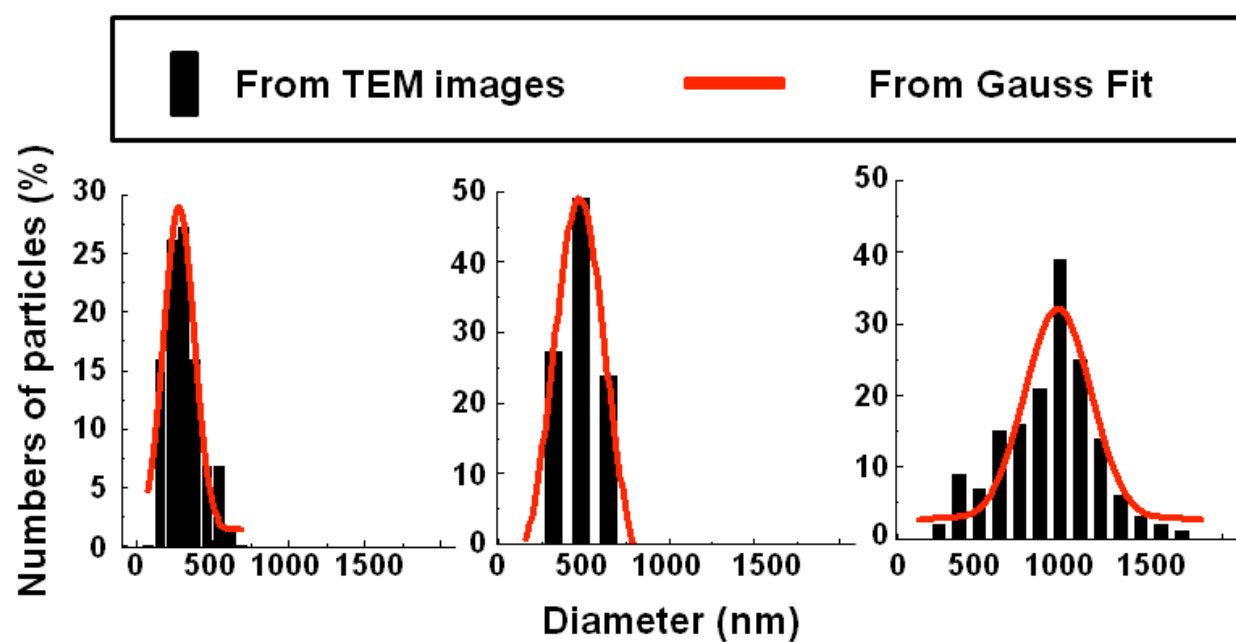

Fig. S2 Size distributions of **1** cast on a TEM grid from a 1:2 H<sub>2</sub>O / THF mixture (2 mM) in visible light atmosphere (left), irradiated by UV (365 nm) for 1 h (middle) and then exposed in visible light for another 1 h (right).

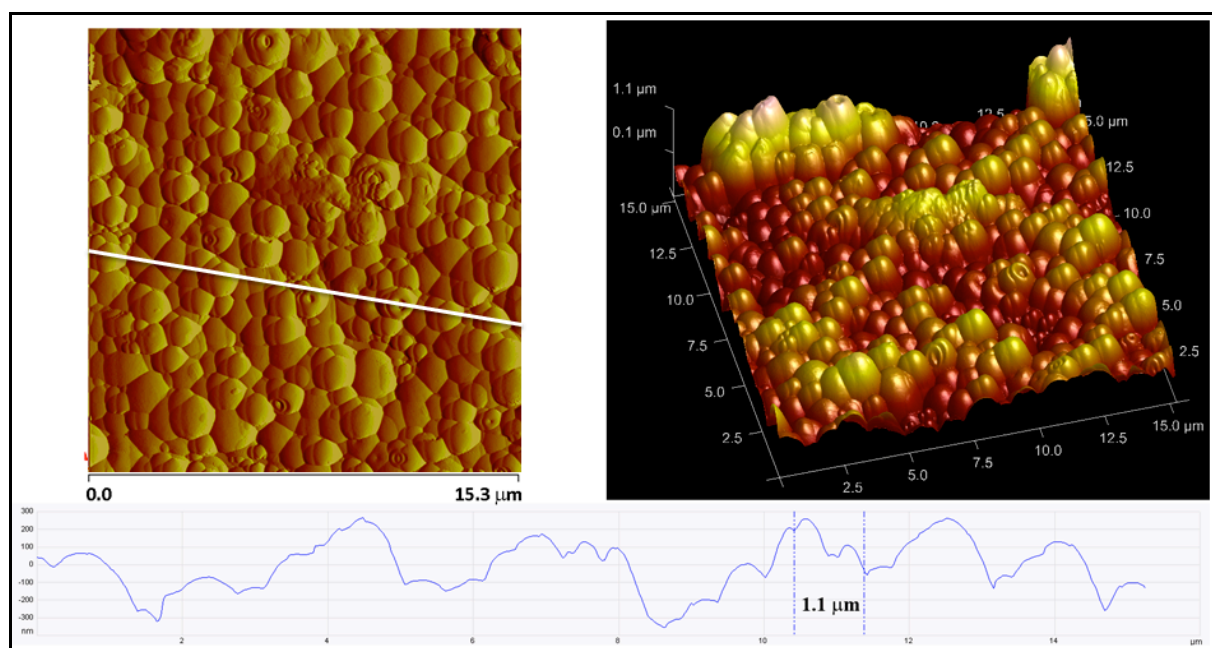

**Fig. S3** The orange-yellow sample solution was dropped onto a silicon plate and allowed to air-dry. Air tapping mode AFM images of assemblies of **1** (upper left, planar image with scale bar = 15.3 μm; upper right, steric image; bottom, a line profile extracted along the marked white trace in the upper left image).

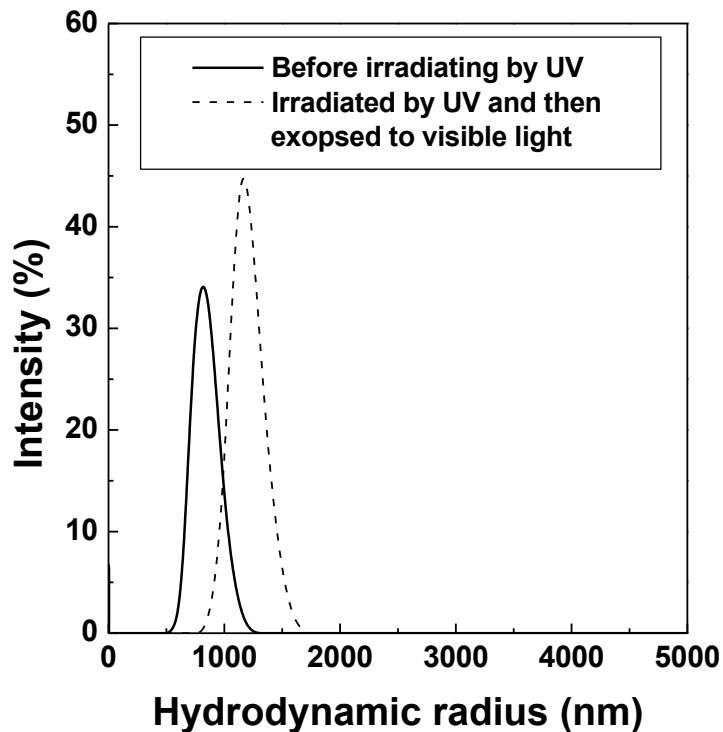

**Fig. S4** DLS size distributions of **1** (molar ratio = 1:1) in the 1:2 H<sub>2</sub>O / THF mixture (2 mM) before irradiating by UV (solid line), after irradiating by UV and exposing in visible light (dash line).

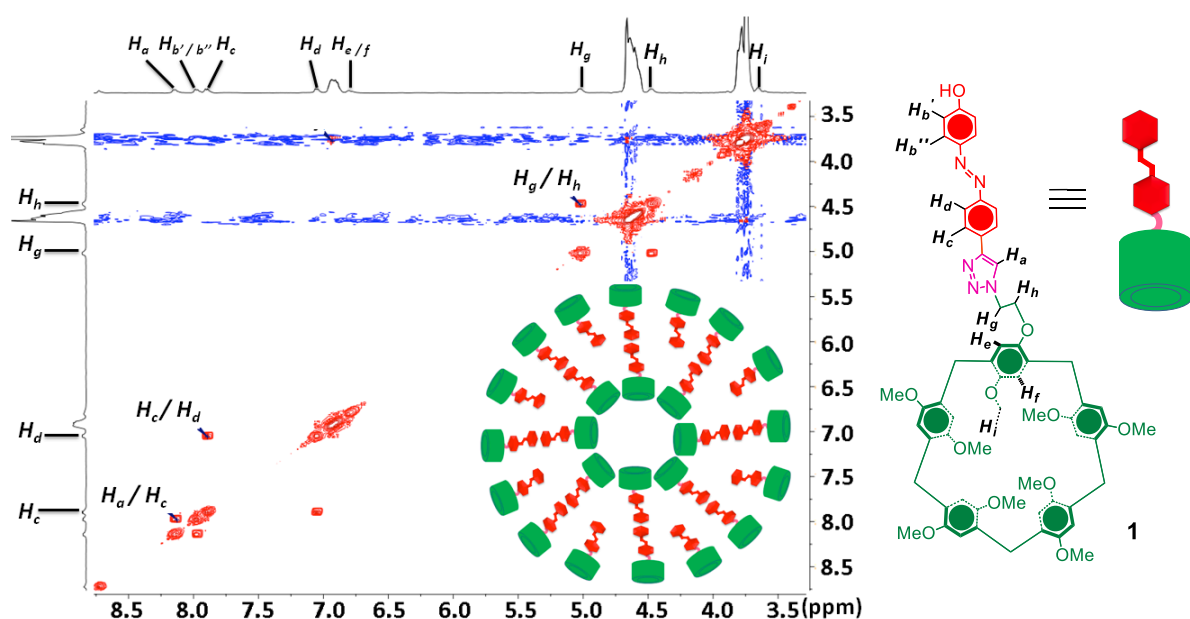

**Fig. S5** 2D NMR NOESY spectrum of **1** at ambient temperature. Inset: proposed structure of lamellar assemblies formed by **1**.

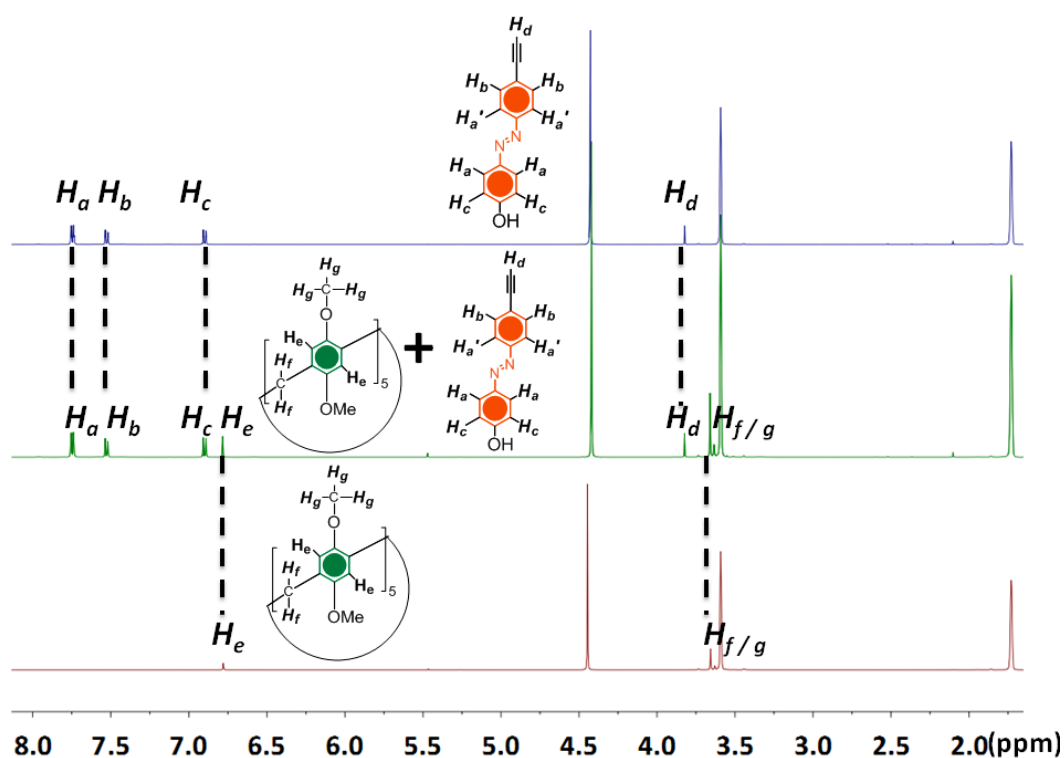

**Fig. S6**  $^1\text{H}$ -NMR spectra (500 MHz, r. t.) of 1:1 **2** and DMPillar[5]arene mixture (2 mM) in 1:2 (v/v)  $\text{D}_2\text{O}$  /  $\text{THF-d}_8$  mixed solvent in comparison with the individual **2** and the individual DMPillar[5]arene.



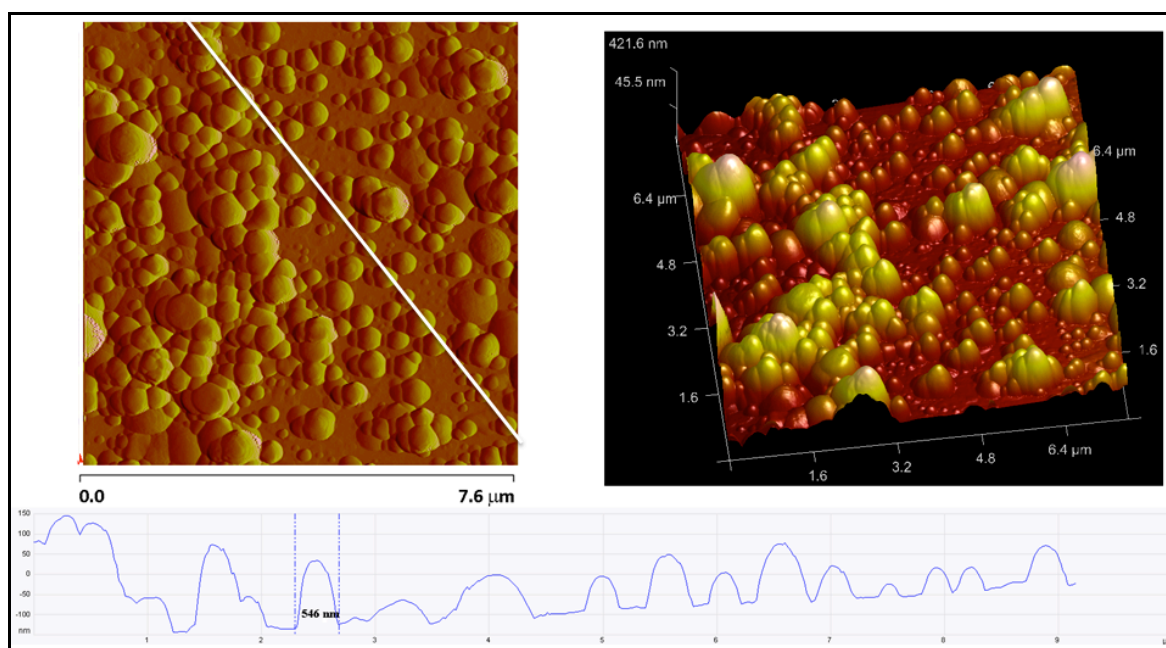

**Fig. S7** The sample solution, **1** in the 1/2 (v/v) mixture of water and THF (2 mM), was irradiated by the UV lamp for 1 hour at rt. One droplet of the solution was cast on a silicon plate and carefully air-dried in the absence of light. Immediately, AFM detection with air tapping mode was performed. Air tapping mode AFM images of assemblies of **1** (upper left, planar image with scale bar = 7.6 μm; upper right, steric image; bottom, a line profile extracted along the marked white trace in the upper left image).

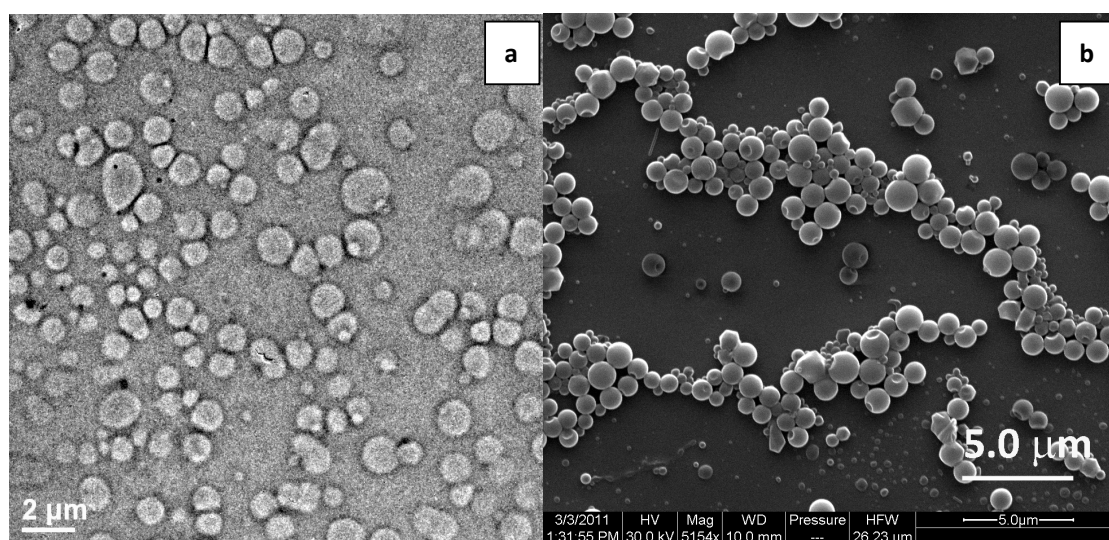

**Fig. S8** Micro-morphology of **1** in the 1:2 H<sub>2</sub>O / THF mixture (2 mM) after exposing in visible light once again for 1 h: negative stained TEM image (a) and gold sputtering SEM images (b, scale bar = 5 μm).

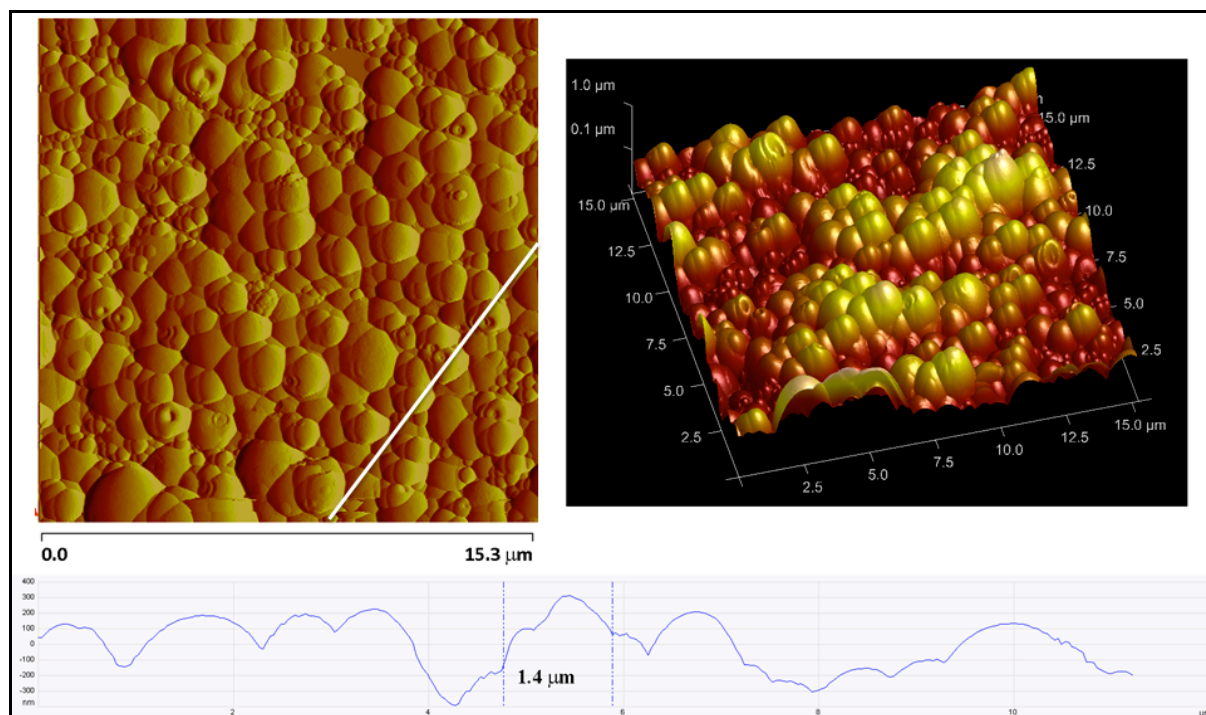

**Fig. S9** Air tapping mode AFM images of assemblies of **1** which were exposed to visible light (upper left, planar image with scale bar = 15.3  $\mu\text{m}$ ; upper right, steric image; bottom, a line profile extracted along the marked white trace in the upper left image).

**Table S1**

**Table S1.** Morphologies and sizes of aggregates obtained by TEM, SEM, ESEM and AFM.

| <i>Conditions</i> | <i>Morphology</i>     | <i>Size (D / nm)</i> |
|-------------------|-----------------------|----------------------|
| Visible light     | Hollow spheres (TEM)  | 150~600 (TEM)        |
|                   | Hollow spheres (SEM)  | 180~700 (SEM)        |
|                   | Hollow spheres (ESEM) | 300~1000 (ESEM)      |
|                   | Hollow spheres (AFM)  | 300~1000 (AFM)       |
| UV (365 nm)       | Solid spheres (TEM)   | 300~650 (TEM)        |
|                   | Solid spheres (SEM)   | 200~600 (SEM)        |
|                   | Solid spheres (AFM)   | 300~700 (AFM)        |
| Visible light     | Hollow spheres (TEM)  | 250~1700 (TEM)       |
|                   | Hollow spheres (SEM)  | 300~1500 (SEM)       |
|                   | Hollow spheres (AFM)  | 300~1800 (AFM)       |



---

## References

- <sup>S1</sup> A. Loudet, J. Han, R. Barhoumi, J. P. Pellois, R. C. Burghardt, K. Burgess, *Org. Biomol. Chem.*, 2008, **6**, 4516.
- <sup>S2</sup> N. L. Strutt, R. S. Forgan, J. S. Spruell, Y. Y. Botros, J. F. Stoddart, *J. Am. Chem. Soc.*, 2011, **133**, 5668.
- <sup>S3</sup> (a) P. Mukerjee, M. J. Gumkowski, C. C. Chan, R. Sharma, *J. Phys. Chem.*, 1990, **94**, 8832; (b) B. W. Liu, Y. Chen, B. E. Song, Y. Liu, *Chem. Commun.*, 2011, **47**, 4418.
